# Supplementary material for: Synthesis, crystal structure and characterization of a new layered gallium phosphite Ga(HPO3)F3·(trans-C6N2H16) with left- and right-handed helical chains
Source: Royal Society of Chemistry journal article supplement (doi:10.1039/b926096j), 2010-01-01
Supplement: b926096j.pdf [file b926096j.pdf]

## Synthesis, crystal structure and characterization of a new layered gallium phosphite $\text{Ga}(\text{HPO}_3)\text{F}_3 \cdot (\text{trans-C}_6\text{N}_2\text{H}_{16})$ with left- and right-handed helical chains

Liangliang Huang,<sup>a</sup> Tianyou Song,<sup>a</sup> Lirong Zhang,<sup>a</sup> Yanli Chen,<sup>a</sup> Jinhua Jiang,<sup>a</sup> Jianing Xu<sup>\*b</sup> and Li Wang<sup>\*a</sup>

Received (in XXX, XXX) Xth XXXXXXXXXX 200X, Accepted Xth XXXXXXXXXX 200X

First published on the web Xth XXXXXXXXXX 200X

DOI: 10.1039/b000000x

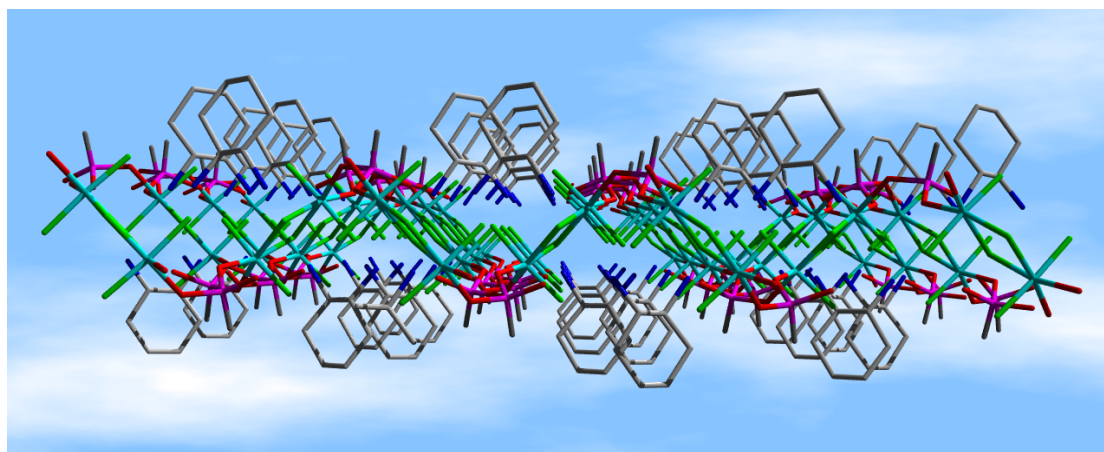

Fig. S1 The trans-DACH residing above and below the 2D layer of compound **1** view along [001] direction.

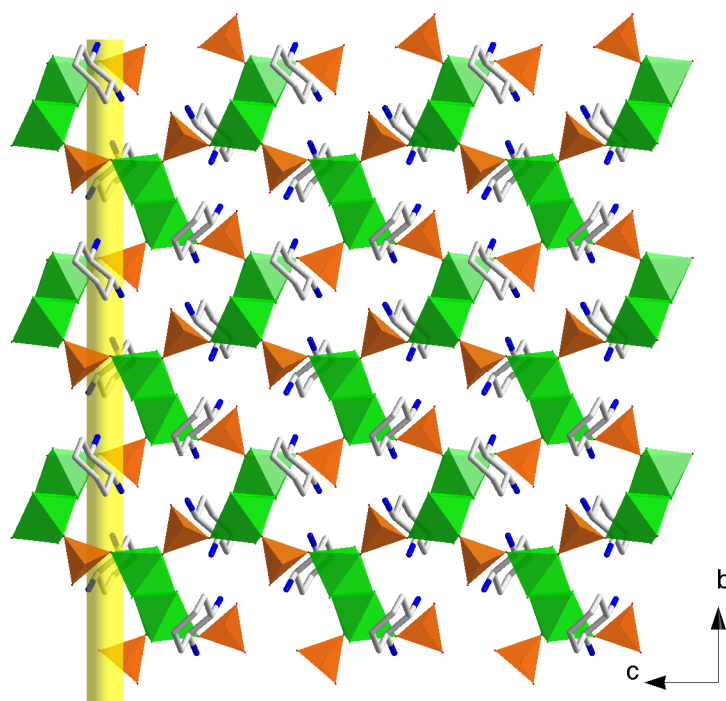

Fig. S2 Polyhedron view of the 2D layer structure showing the arrangement of the enantiomers of trans-DACH along the  $2_1$  screw axis.

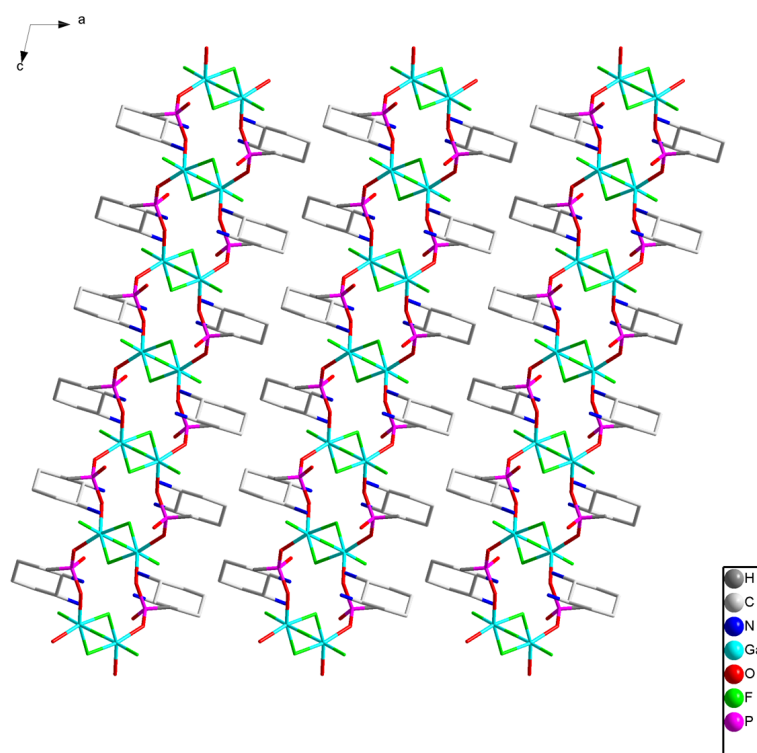

Fig. S3 Packing of the undulated layers of **1** viewed along the  $[010]$  direction.
